# Supplementary material
Source: PubMed Central journal article supplement (PMC365726)
Supplement: pnas_101_9_2951__1.pdf [file pnas_101_9_2951__1.pdf]

**Table 5. Thermophilic and mesophilic prokaryotes included in this study**

| Domain   | Species                                             | OGT   | AG%    | GC%    |
|----------|-----------------------------------------------------|-------|--------|--------|
| <b>A</b> | <b><i>Crenarchaeota</i></b>                         |       |        |        |
| A        | <i>Aeropyrum pernix K1</i>                          | 95°C  | 52.468 | 57.648 |
| A        | <i>Sulfolobus solfataricus P2</i>                   | 80°C  | 56.023 | 36.552 |
| A        | <i>Pyrobaculum aerophilum IM2</i>                   | 104°C | 54.652 | 52.031 |
| <b>A</b> | <b><i>Euryarchaeota</i></b>                         |       |        |        |
| A        | <i>Archaeoglobus fulgidus DSM4304</i>               | 83°C  | 56.042 | 49.416 |
| A        | <i>Methanobacterium thermoautotrophicum delta H</i> | 65°C  | 54.985 | 50.656 |
| A        | <i>Methanococcus jannaschii DSM2661</i>             | 85°C  | 58.933 | 31.958 |
| A        | <i>Pyrococcus horikoshii shinkaj OT3</i>            | 95°C  | 56.048 | 42.395 |
| A        | <i>Pyrococcus abyssi GE5</i>                        | 103°C | 57.243 | 45.229 |
| A        | <i>Pyrococcus furiosus DSM 3638</i>                 | 102°C | 57.318 | 41.153 |
| A        | <i>Thermoplasma acidophilum DSM 1728</i>            | 60°C  | 54.466 | 47.355 |
| A        | <i>Thermoplasma volcanium GSS1</i>                  | 60°C  | 54.968 | 41.217 |
| <b>B</b> | <b><i>Aquificae</i></b>                             |       |        |        |
| B        | <i>Aquifex aeolicus VF5</i>                         | 96°C  | 56.898 | 43.768 |
| <b>B</b> | <b><i>Firmicutes</i></b>                            |       |        |        |
| B        | <i>Thermoanaerobacter tengcongensis MB4(T)</i>      | 80°C  | 57.786 | 37.878 |
| <b>B</b> | <b><i>Thermotogales</i></b>                         |       |        |        |
| B        | <i>Thermotoga maritima MSB8</i>                     | 80°C  | 55.544 | 46.446 |
| <b>A</b> | <b><i>Halobacteria</i></b>                          |       |        |        |
| A        | <i>Halobacterium sp. NRC-1</i>                      | 37°C  | 51.075 | 67.479 |
| <b>A</b> | <b><i>Methanosarcinales</i></b>                     |       |        |        |
| A        | <i>Methanosarcina acetivorans str. C2A,</i>         | 35°C  | 49.939 | 45.239 |
| <b>B</b> | <b><i>Actinobacteria</i></b>                        |       |        |        |
| B        | <i>Mycobacterium tuberculosis H37Rv</i>             | 37°C  | 50.409 | 66.021 |
| B        | <i>Mycobacterium tuberculosis CDC1551</i>           | 37°C  | 50.401 | 65.929 |
| B        | <i>Mycobacterium leprae TN</i>                      | 37°C  | 50.325 | 58.91  |
| <b>B</b> | <b><i>Bacteroidetes</i></b>                         |       |        |        |
| B        | <i>Porphyromonas gingivalis W83</i>                 | 37°C  | 51.631 | 49.334 |
| <b>B</b> | <b><i>Chlamydiae</i></b>                            |       |        |        |
| B        | <i>Chlamydia trachomatis serovar D</i>              | 37°C  | 49.985 | 41.725 |
| B        | <i>Chlamydia muridarum strain Nigg</i>              | 37°C  | 50.039 | 40.753 |
| B        | <i>Chlamydia pneumoniae CWL029</i>                  | 35°C  | 50.031 | 41.419 |
| B        | <i>Chlamydia pneumoniae AR39</i>                    | 35°C  | 50.045 | 41.384 |
| B        | <i>Chlamydia pneumoniae J138</i>                    | 35°C  | 50.03  | 41.429 |
| <b>B</b> | <b><i>Chlorobi</i></b>                              |       |        |        |
| B        | <i>Chlorobium tepidum TLS</i>                       | 47°C  | 50.671 | 57.783 |
| <b>B</b> | <b><i>Cyanobacteria</i></b>                         |       |        |        |
| B        | <i>Synechocystis sp. PCC6803</i>                    | 25°C  | 50.464 | 48.681 |
| B        | <i>Nostoc sp. PCC 7120</i>                          | 26°C  | 51.568 | 42.411 |
| <b>B</b> | <b><i>Deinococcus-Thermus</i></b>                   |       |        |        |
| B        | <i>Deinococcus radiodurans R1</i>                   | 30°C  | 50.168 | 67.365 |
| <b>B</b> | <b><i>Firmicutes</i></b>                            |       |        |        |
| B        | <i>Bacillus subtilis 168</i>                        | 30°C  | 54.042 | 44.365 |
| B        | <i>Bacillus halodurans C-125</i>                    | 30°C  | 53.773 | 44.424 |
| B        | <i>Listeria innocua CLIP 11262</i>                  | 37°C  | 54.572 | 37.926 |
| B        | <i>Listeria monocytogenes EGD-e</i>                 | 37°C  | 54.402 | 38.535 |
| B        | <i>Staphylococcus aureus COL</i>                    | 37°C  | 54.958 | 33.536 |
| B        | <i>Staphylococcus aureus N315</i>                   | 37°C  | 54.905 | 33.665 |
| B        | <i>Staphylococcus aureus Mu50</i>                   | 37°C  | 54.916 | 33.671 |
| B        | <i>Enterococcus faecalis V583</i>                   | 37°C  | 54.251 | 37.978 |
| B        | <i>Lactococcus lactis subsp. lactis IL1403</i>      | 30°C  | 52.901 | 36.267 |

| Domain | Species                                               | OGT  | AG%    | GC%    |
|--------|-------------------------------------------------------|------|--------|--------|
| B      | <i>Streptococcus pneumoniae</i> TIGR4                 | 37°C | 52.189 | 40.558 |
| B      | <i>Streptococcus pneumoniae</i> R6                    | 37°C | 52.271 | 40.626 |
| B      | <i>Streptococcus pyogenes</i> SF370 serotype M1       | 37°C | 52.170 | 39.210 |
| B      | <i>Mycoplasma genitalium</i> G-37                     | 37°C | 52.973 | 31.618 |
| B      | <i>Mycoplasma pneumoniae</i> M129                     | 37°C | 52.314 | 40.839 |
| B      | <i>Ureaplasma urealyticum parvum biovar serovar 3</i> | 37°C | 54.157 | 25.766 |
| B      | <i>Mycoplasma pulmonis</i> UAB CTIP                   | 37°C | 54.805 | 27.340 |
| B      | <b>Proteobacteria</b>                                 |      |        |        |
| B      | <i>Caulobacter crescentus</i> CB15                    | 37°C | 49.500 | 67.809 |
| B      | <i>Brucella melitensis</i> 16M                        | 35°C | 49.808 | 58.401 |
| B      | <i>Mesorhizobium loti</i> MAFF303099                  | 27°C | 49.662 | 63.366 |
| B      | <i>Sinorhizobium meliloti</i> 1021                    | 27°C | 49.631 | 62.972 |
| B      | <i>Agrobacterium tumefaciens</i> C58 Cereon           | 26°C | 49.424 | 59.849 |
| B      | <i>Agrobacterium tumefaciens</i> C58 UWash            | 26°C | 49.374 | 59.885 |
| B      | <i>Rickettsia prowazekii</i> Madrid E                 | 35°C | 53.978 | 30.481 |
| B      | <i>Rickettsia conorii</i> Malish 7                    | 33°C | 54.179 | 32.926 |
| B      | <i>Neisseria meningitidis</i> MC58                    | 37°C | 51.388 | 52.957 |
| B      | <i>Neisseria meningitidis</i> serogroup A Z2491       | 37°C | 51.313 | 53.325 |
| B      | <i>Campylobacter jejuni</i> NCTC 11168                | 43°C | 54.291 | 30.888 |
| B      | <i>Helicobacter pylori</i> 26695                      | 37°C | 53.667 | 39.626 |
| B      | <i>Helicobacter pylori</i> J99                        | 37°C | 53.669 | 39.975 |
| B      | <i>Yersinia pestis</i> KIM                            | 28°C | 51.343 | 49.013 |
| B      | <i>Escherichia coli</i> K12-MG1655                    | 37°C | 51.385 | 51.95  |
| B      | <i>Escherichia coli</i> O157:H7 EDL933                | 37°C | 51.766 | 51.61  |
| B      | <i>Escherichia coli</i> O157:H7 VT2-Sakai             | 37°C | 51.813 | 51.73  |
| B      | <i>Salmonella typhimurium</i> LT2 SGSC1412            | 37°C | 51.471 | 53.494 |
| B      | <i>Salmonella enterica</i> serovar Typhi CT18         | 37°C | 51.429 | 53.38  |
| B      | <i>Buchnera</i> sp. APS                               | 18°C | 54.051 | 27.504 |
| B      | <i>Haemophilus influenzae</i> KW20                    | 37°C | 52.371 | 38.872 |
| B      | <i>Pasteurella multocida</i> PM70                     | 37°C | 52.11  | 41.153 |
| B      | <i>Vibrio cholerae</i> El Tor N16961                  | 37°C | 51.295 | 48.225 |
| B      | <i>Xylella fastidiosa</i> 9a5c                        | 26°C | 50.262 | 53.833 |
| B      | <i>Magnetococcus</i> sp. MC-1                         | —    | 51.053 | 54.873 |
| B      | <b>Spirochaetales</b>                                 | —    | —      | —      |
| B      | <i>Borrelia burgdorferi</i> B31                       | 37°C | 55.321 | 28.877 |
| B      | <i>Treponema pallidum</i> Nichols                     | 37°C | 50.813 | 52.707 |

OGT, optimal growth temperature; A, *Archaea* domain; B, *Bacteria* domain; AG%, average percentage of adenine plus guanine (purines) in the whole mRNAs of the organisms; and GC%, average guanine plus cytosine percentage in the whole mRNAs the organisms.
