# Supplementary material
Source: PubMed Central journal article supplement (PMC365726)
Supplement: pnas_101_9_2951__2.pdf [file pnas_101_9_2951__2.pdf]

**Table 6. AG% content of the mRNA of AP, RP, and HSP of thermophilic species**

| Domain | Organism                                                | AP     | RP     | Difference<br>RP-AP | HSP    | Difference<br>HSP-AP |
|--------|---------------------------------------------------------|--------|--------|---------------------|--------|----------------------|
| A      | <i>Aeropyrum pernix</i>                                 | 50.923 | 60.784 | 9.861               | 58.399 | 7.476                |
| B      | <i>Aquifex aeolicus</i>                                 | 57.040 | 62.239 | 5.199               | 62.135 | 5.095                |
| A      | <i>Archaeoglobus fulgidus</i>                           | 56.407 | 62.042 | 5.635               | 59.438 | 3.031                |
| A      | <i>Methanobacterium<br/>thermoautotrophicum delta H</i> | 55.224 | 61.048 | 5.824               | 57.749 | 2.525                |
| A      | <i>Methanococcus jannaschii</i>                         | 59.035 | 64.141 | 5.106               | 57.987 | -1.048               |
| A      | <i>Pyrobaculum aerophilum</i>                           | 54.985 | 59.159 | 4.174               | 55.024 | 0.039                |
| A      | <i>Pyrococcus abyssi</i>                                | 57.416 | 62.219 | 4.803               | 58.539 | 1.123                |
| A      | <i>Pyrococcus horikoshii</i>                            | 54.707 | 62.139 | 7.432               | 54.229 | -0.478               |
| A      | <i>Pyrococcus furiosus</i>                              | 57.488 | 62.782 | 5.294               | 57.954 | 0.466                |
| A      | <i>Sulfolobus solfataricus</i>                          | 56.454 | 62.143 | 5.689               | 56.185 | -0.269               |
| B      | <i>Thermotoga Maritima</i>                              | 55.720 | 61.797 | 6.077               | 58.754 | 3.034                |
| A      | <i>Thermoplasma volcarium</i>                           | 55.597 | 61.713 | 6.116               | 58.699 | 3.102                |
| A      | <i>Thermoplasma acidophilum</i>                         | 54.916 | 61.196 | 6.280               | 58.341 | 3.425                |
| B      | <i>Thermoanaerobacter<br/>tengcongensis MB4(T)</i>      | 57.825 | 62.384 | 4.559               | 59.343 | 1.518                |

AG%, A+G percentage; A, *Archaea* domain; B, *Bacteria* domain; AP, all proteins; RP, ribosomal proteins; and HSP, heat shock proteins. Average AG% of genes for AP, RP, difference RP-AP, HSP, and difference HSP-AP are 55.981, 61.842, 5.861, 58.055, and 2.074, respectively.
