# Supplementary material
Source: PubMed Central journal article supplement (PMC365726)
Supplement: pnas_101_9_2951__3.pdf [file pnas_101_9_2951__3.pdf]

**Table 7. AG% content of the mRNA of AP, RP, and HSP of mesophilic species**

| Domain | Organism                           | AP     | RP     | Difference<br>RP-AP | HSP    | Difference<br>HSP-AP |
|--------|------------------------------------|--------|--------|---------------------|--------|----------------------|
| B      | <i>Agrobacterium cereon</i>        | 49.534 | 51.529 | 1.995               | 50.535 | 1.001                |
| B      | <i>Bacillus haloduras</i>          | 53.928 | 56.159 | 2.231               | 55.852 | 1.924                |
| B      | <i>B. subtilis</i>                 | 54.287 | 55.197 | 0.910               | 55.624 | 1.337                |
| B      | <i>Borrelia burgdorferi B31</i>    | 55.164 | 59.683 | 4.519               | 58.393 | 3.229                |
| B      | <i>Brucella melitensis</i>         | 49.871 | 51.619 | 1.748               | 51.552 | 1.681                |
| B      | <i>Buchnera sp. APS</i>            | 54.226 | 55.898 | 1.672               | 56.652 | 2.426                |
| B      | <i>Campylobacter jejuni</i>        | 54.425 | 59.468 | 5.043               | 58.411 | 3.986                |
| B      | <i>Caulobacter crescentus</i>      | 49.550 | 51.368 | 1.818               | 50.582 | 1.032                |
| B      | <i>Chlamidia pneumoniae 029</i>    | 50.112 | 56.060 | 5.948               | 52.748 | 2.636                |
| B      | <i>Chlorobium tepidum TLS</i>      | 50.756 | 55.315 | 4.559               | 53.986 | 3.230                |
| B      | <i>Dienococcus radioresistance</i> | 50.130 | 52.561 | 2.431               | 51.647 | 1.517                |
| B      | <i>Enterococcus faecali</i>        | 54.286 | 56.553 | 2.267               | 58.434 | 4.148                |
| B      | <i>Escherichia coli O157:H7</i>    | 51.958 | 51.923 | -0.035              | 52.830 | 0.872                |
| B      | <i>Escherichia coli k12</i>        | 51.542 | 50.645 | -0.897              | 52.699 | 1.157                |
| B      | <i>Haemophilus influenza</i>       | 52.479 | 53.602 | 1.123               | 52.941 | 0.462                |
| A      | <i>Halobacterium NRC-1</i>         | 51.182 | 55.355 | 4.173               | 52.762 | 1.580                |
| B      | <i>Helicobacter pylori</i>         | 53.801 | 58.836 | 5.035               | 58.804 | 5.003                |
| B      | <i>Chlamidia trachomatis</i>       | 50.257 | 56.082 | 5.825               | 52.593 | 2.336                |
| B      | <i>Lactococcus lactis</i>          | 53.268 | 53.320 | 0.052               | 52.421 | -0.847               |
| B      | <i>Listeria innocua</i>            | 54.930 | 55.397 | 0.467               | 55.714 | 0.784                |
| B      | <i>Magnetococcus M-MC1</i>         | 50.845 | 53.279 | 2.434               | 51.697 | 0.852                |
| A      | <i>M. acetivorans str. C2A</i>     | 49.939 | 52.406 | 2.467               | 56.097 | 6.158                |
| B      | <i>Mesorhizobium loti</i>          | 49.821 | 52.012 | 2.191               | 52.469 | 2.648                |
| B      | <i>Mycoplasma pulmonis</i>         | 54.771 | 59.877 | 5.106               | 53.353 | -1.418               |
| B      | <i>Mycobacterium tuberculosis</i>  | 50.423 | 53.347 | 2.924               | 51.341 | 0.918                |
| B      | <i>Mycoplasma genitalium</i>       | 53.145 | 56.914 | 3.769               | 55.966 | 2.821                |
| B      | <i>Mycoplasma pneumoniae</i>       | 52.433 | 55.369 | 2.936               | 54.889 | 2.456                |
| B      | <i>Neisseria meningitis</i>        | 51.518 | 52.500 | 0.982               | 50.929 | -0.589               |
| B      | <i>N. meningitidis A Z2491</i>     | 51.669 | 52.560 | 0.891               | 53.687 | 2.018                |
| B      | <i>Nostoc sp.</i>                  | 51.695 | 54.902 | 3.207               | 53.176 | 1.481                |
| B      | <i>Porphyromonas gingivalis</i>    | 51.607 | 55.396 | 3.789               | 56.521 | 4.914                |
| B      | <i>Rickettsia prowazekii</i>       | 54.250 | 58.643 | 4.393               | 56.538 | 2.288                |
| B      | <i>Salmonella enterica</i>         | 51.634 | 52.353 | 0.719               | 52.847 | 1.213                |
| B      | <i>Salmonella typhimurium</i>      | 51.562 | 52.759 | 1.197               | 53.401 | 1.839                |
| B      | <i>Sinorhizobium meliloti 1021</i> | 49.795 | 51.872 | 2.077               | 51.750 | 1.955                |
| B      | <i>Staphilococcus aureus COL</i>   | 54.971 | 57.181 | 2.210               | 57.107 | 2.136                |
| B      | <i>Staphilococcus aureus mu50</i>  | 54.933 | 57.154 | 2.221               | 57.584 | 2.651                |
| B      | <i>Streptococcus piogenes</i>      | 52.526 | 53.471 | 0.945               | 54.297 | 1.771                |
| B      | <i>Streptococcus pneumonia</i>     | 52.355 | 53.802 | 1.447               | 53.053 | 0.698                |
| B      | <i>Synechocystis sp.</i>           | 50.557 | 52.230 | 1.673               | 52.934 | 2.377                |
| B      | <i>Treponema pallidum Nichols</i>  | 51.004 | 56.152 | 5.148               | 53.106 | 2.102                |
| B      | <i>Ureaplasma urealyticum</i>      | 54.335 | 57.360 | 3.025               | 57.336 | 3.001                |
| B      | <i>Vibrio cholerae</i>             | 51.191 | 52.603 | 1.412               | 53.616 | 2.425                |
| B      | <i>Xulella fastidiosa</i>          | 50.308 | 51.879 | 1.571               | 51.449 | 1.141                |
| B      | <i>Yersenia pestis</i>             | 51.493 | 52.473 | 0.980               | 52.059 | 0.566                |

AP, all proteins; RP, ribosomal proteins; HSP, heat shock proteins. Average AG% of genes for AP, RP, difference RP-AP, difference HSP-AP, and HSP are 52.099, 54.557, 2.458, 54.053, and 1.954, respectively. Average AG% of nucleotides for AP, RP, difference RP-AP, difference HSP-AP, and HSP are 51.517, 54.561, 3.044, 54.283, and 2.766, respectively.
